# Supplementary material for: Surface sites assembled-strategy on Pt–Ru nanowires for accelerated methanol oxidation
Source: Royal Society of Chemistry journal article supplement (doi:10.1039/d0dt02567d), 2020-01-01
Supplement: d0dt02567d1.pdf [file d0dt02567d1.pdf]

## Supporting information

# Surface sites assemble strategy on Pt-Ru nanowires for accelerated methanol oxidation

*Mingxuan Li,<sup>†</sup> Yao Wang,<sup>†</sup> Jing Cai,<sup>†</sup> Yunrui Li,<sup>†</sup> Yujie Liu,<sup>†</sup> Yin Dong,<sup>†</sup> Shuna Li,<sup>†</sup> Xiaolin Yuan,<sup>†</sup> Xin Zhang<sup>\*,†</sup> and Xiaoping Dai<sup>†</sup>*

<sup>†</sup>State Key Laboratory of Heavy Oil Processing, College of Chemical Engineering and Environment, China University of Petroleum, Beijing 102249, China

Corresponding author: Xin Zhang\*

## Characterization Techniques.

Transmission electron microscopy (TEM) images were collected by JEM-2100 at 200 kV. The magnified images of the NWs were confirmed by a Tecnai G2 F20 S-Twin high resolutions transmission electron microscope (HRTEM) operating at 200 kV. The crystal structure of the NWs was evaluated by X-ray diffraction (XRD) patterns using a Brüker D8 Advance diffractometer at 40 kV and 40 mA for Cu K $\alpha$  radiation ( $\lambda_{K_{\alpha 1}} = 1.5406 \text{ \AA}$ ;  $\lambda_{K_{\alpha 2}} = 1.5443 \text{ \AA}$ ), with a scan speed of 5 °/min and a step size of 0.02 in  $2\theta$ , instrument broadening: 0.12°. The valence states of Pt and Ru was carried out on X-ray photoelectron spectrum (XPS) test using PHI 5000 Versaprobe system with monochromatic Al K $\alpha$  radiation (1486.6 eV), all the values of binding energy were calibrated by the C1s peak at 284.6 eV. Inductively coupled plasma-optical emission spectroscopy (ICP-OES) was performed on IRIS Intrepid II XSP (Thermo Fisher), working parameters: RF power, 1150 W; nebulizer flow, 26.0 PSI; auxiliary gas, 1.0 LPM.

**Table S1.** The compositions of RuPt NWs and Ru@Pt NWs catalysts determined by ICP-OES.

| Catalysts                      | Mass ratio (Pt: Ru) |
|--------------------------------|---------------------|
| Ru/Pt NWs                      | 100:0.45            |
| Ru@Pt NWs                      | 100:0.42            |
| 0.09%Ru/Pt NWs                 | 100:0.09            |
| 1.9%Ru/Pt NWs                  | 100:1.92            |
| Ru/Pt NWs after stability test | 100:0.40            |

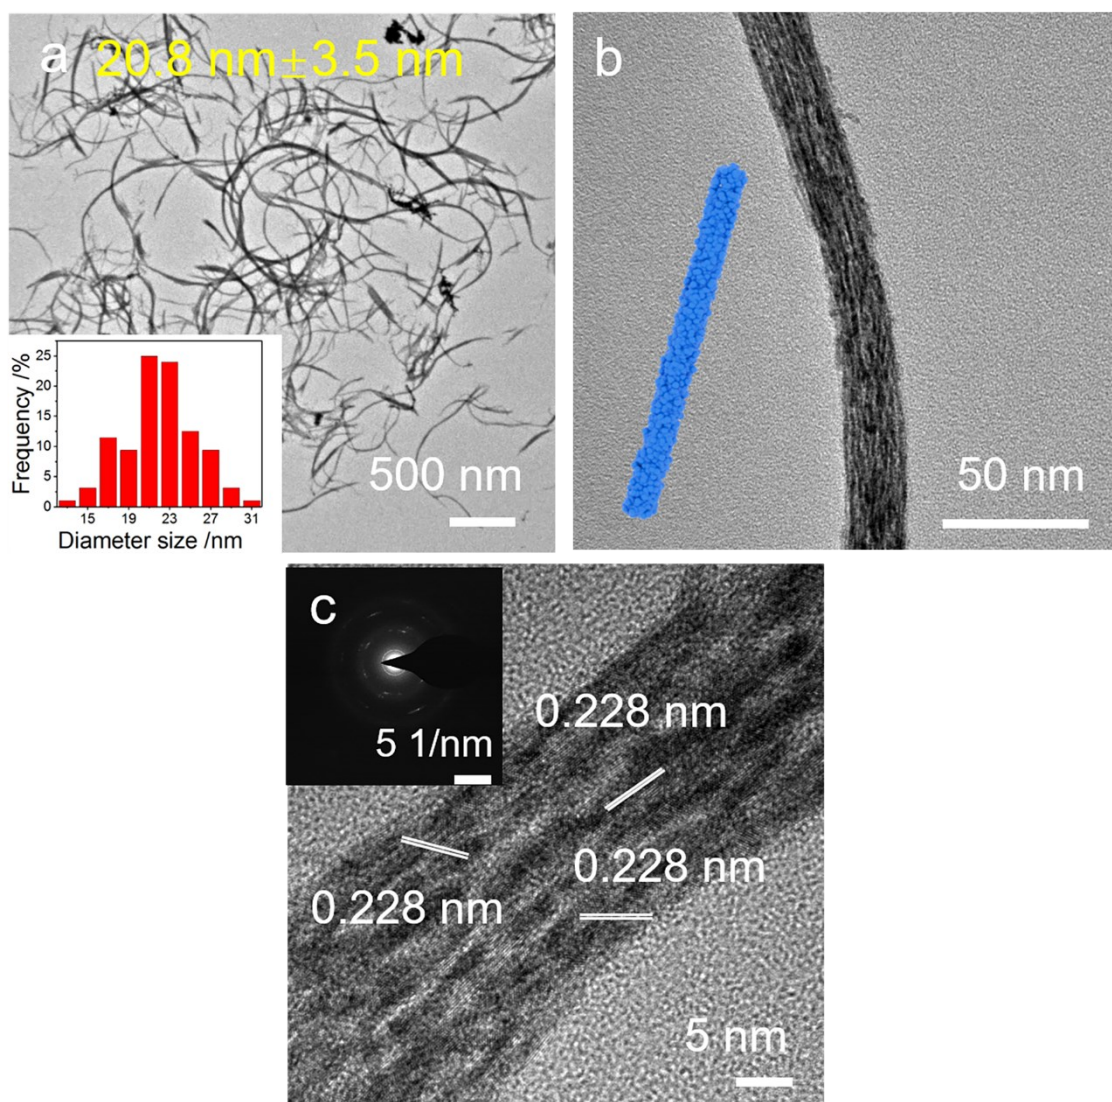

**Fig. S1.** (a) (b) TEM and (c) HRTEM images of pure Pt NWs.

**Table S2** The XRD data of different materials.

| materials                | 2 $\theta$ /degree<br>(111) | lattice<br>parameter (Å) | strain (%) |
|--------------------------|-----------------------------|--------------------------|------------|
| Pt crystal (PDF#04-0802) | 39.76                       | 0.2538                   | -          |
| Ru/Pt NWs                | 40.124                      | 0.2519                   | 0.75       |
| Ru@Pt NWs                | 40.068                      | 0.2522                   | 0.63       |

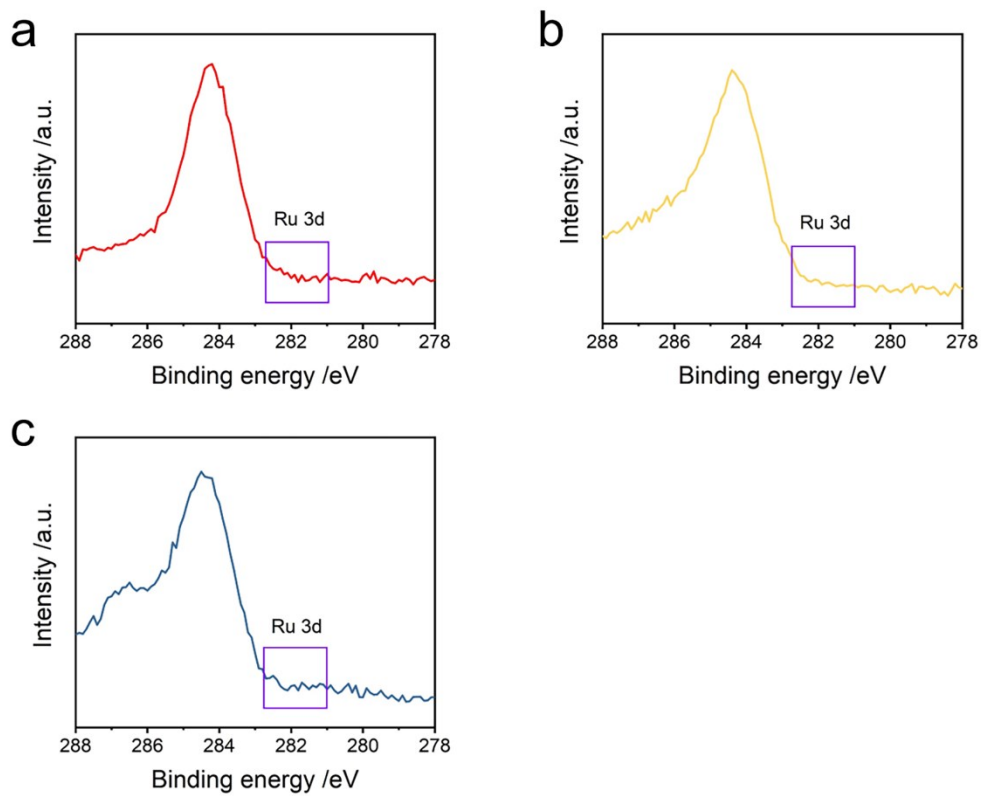

**Fig. S2.** XPS patterns of the Ru 3d of the as-prepared (a) Pt NWs (b) Ru/Pt NWs and (d) Ru@Pt NWs catalysts.

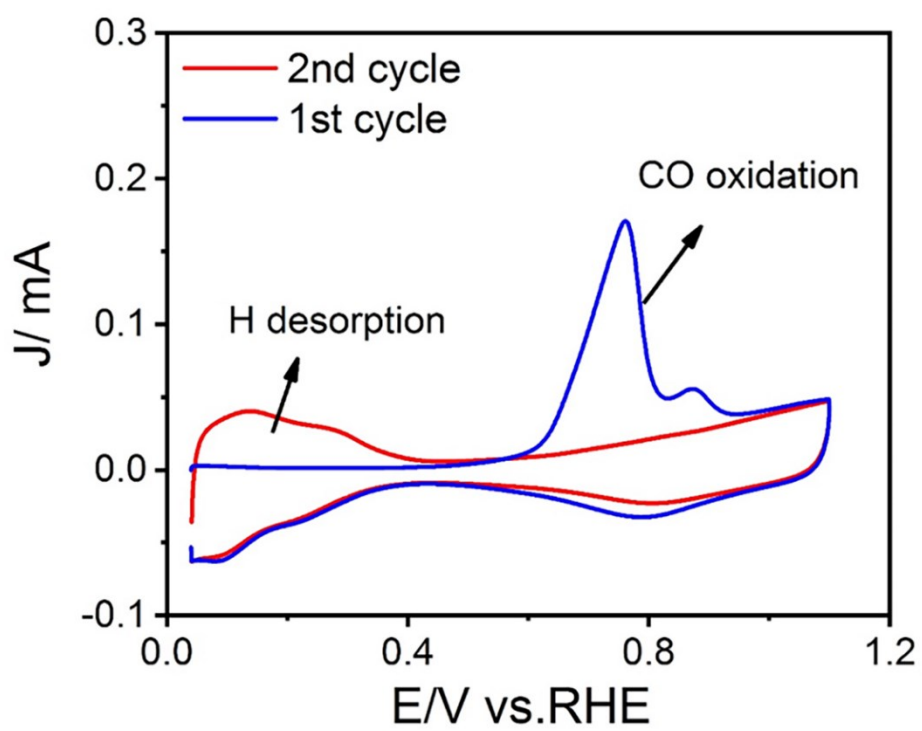

**Fig. S3.** Illustration of CO-stripping curves of Ru/Pt NWs.

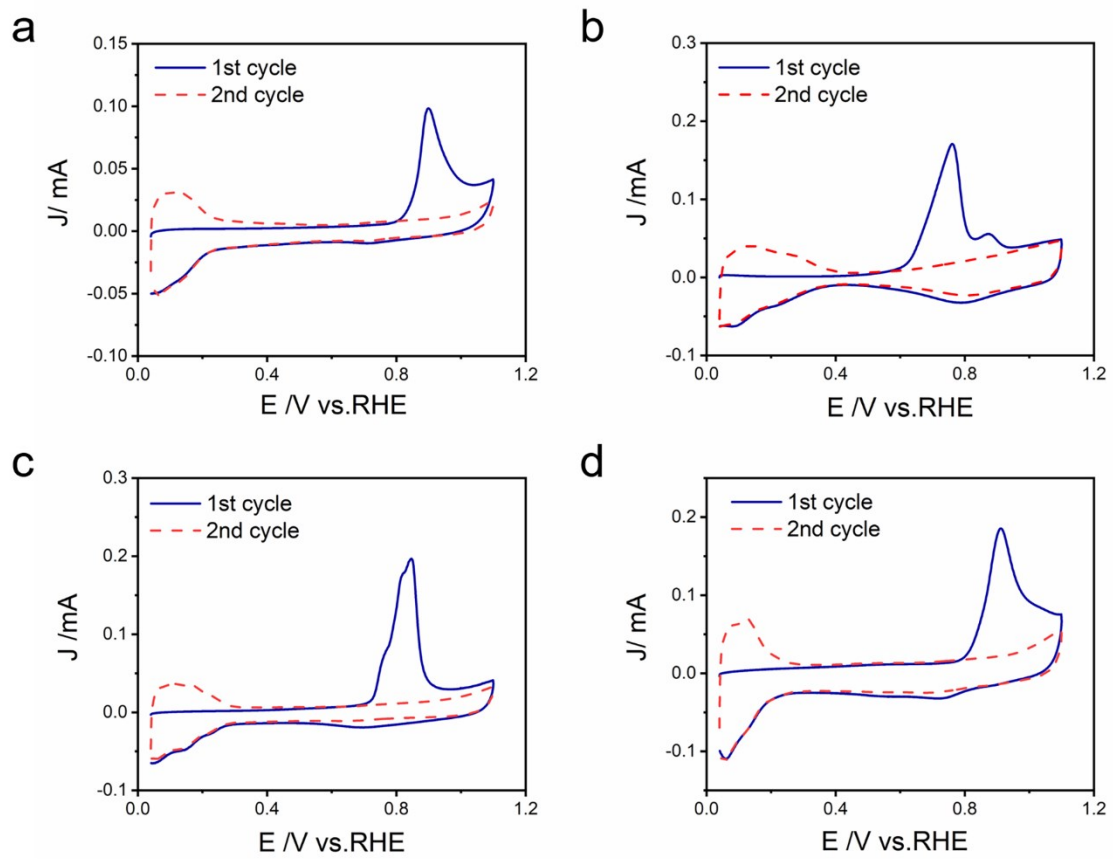

**Fig S4.** The whole CO stripping curves of (a) Pt NWs, (b) Ru/Pt NWs, (c) Ru@Pt NWs and (d) Pt/C modified electrodes.



**Table S3.** Summaries of ECSA<sub>H</sub>, ECSA<sub>CO</sub> and their ratios; the two peak areas of CO oxidation and their ratios in 0.1 M HClO<sub>4</sub> solution at a sweep rate of 50 mV s<sup>-1</sup>.

| sanples        | ECSA <sub>H</sub> (m <sup>2</sup> g <sup>-1</sup> <sub>pt</sub> ) | ECSA <sub>H</sub> / ECSA <sub>CO</sub> | ECSA <sub>CO</sub> of first peak (m <sup>2</sup> g <sup>-1</sup> <sub>pt</sub> ) | ECSA <sub>CO</sub> (m <sup>2</sup> g <sup>-1</sup> <sub>pt</sub> ) | First peak area/total peak area |
|----------------|-------------------------------------------------------------------|----------------------------------------|----------------------------------------------------------------------------------|--------------------------------------------------------------------|---------------------------------|
| Pt NWs         | 9.39                                                              | 1.00: 1.08                             | -                                                                                | 10.14                                                              | -                               |
| Ru/Pt NWs      | 19.75                                                             | 1.00: 0.99                             | 18.64                                                                            | 19.55                                                              | 95.37%                          |
| Ru@Pt NWs      | 13.54                                                             | 1.00: 1.14                             | 3.59                                                                             | 15.44                                                              | 23.23%                          |
| Pt/C           | 23.93                                                             | 1.00: 1.11                             | -                                                                                | 26.56                                                              | -                               |
| 0.09%Ru/Pt NWs | 17.47                                                             | 1.00: 1.16                             | 19.20                                                                            | 20.26                                                              | 94.74%                          |
| 1.9%Ru/Pt NWs  | 13.55                                                             | 1.00: 1.09                             | 14.24                                                                            | 14.76                                                              | 96.49%                          |

**Table S4.** Summaries of MOR activity of the prepare NWs and commercial Pt/C in 0.1 M HClO<sub>4</sub> +1 M CH<sub>3</sub>OH solution at 30 °C.

| Sample          | Based on H <sub>upd</sub> |                                      | Based on CO stripping  |
|-----------------|---------------------------|--------------------------------------|------------------------|
|                 | Specific activity         | Mass activity                        | Specific activity      |
|                 | (mA cm <sup>-2</sup> )    | (mA mg <sup>-1</sup> <sub>Pt</sub> ) | (mA cm <sup>-2</sup> ) |
| Pt NWs          | 1.94                      | 219.51                               | 1.80                   |
| Ru/Pt NWs       | 3.93                      | 568.40                               | 3.97                   |
| Ru@Pt NWs       | 2.58                      | 292.89                               | 0.77                   |
| Commercial Pt/C | 1.68                      | 280.00                               | 1.51                   |
| 0.09%Ru/Pt NWs  | 2.60                      | 244.62                               | 2.24                   |
| 1.9%Ru/Pt NWs   | 3.25                      | 337.44                               | 2.98                   |

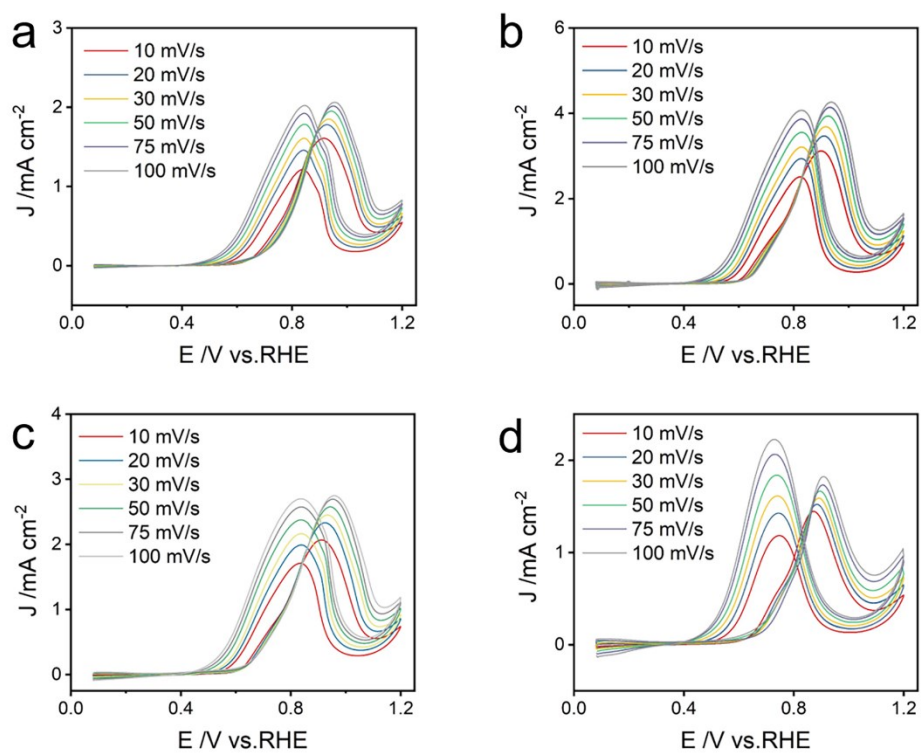

**Fig. S5.** CV plots of methanol electrooxidation on (a) Pt NWs, (b) Ru/Pt NWs, (c) Ru@Pt NWs and (d) Pt/C modified electrodes at different scan rates.

**Table S5.** The slope values of catalysts in this work

| Samples        | Slope value | Pearson correlation coefficient |
|----------------|-------------|---------------------------------|
| Pt NWs         | 0.063       | 0.96845                         |
| Ru/Pt NWs      | 0.1642      | 0.98223                         |
| Ru@Pt NWs      | 0.104       | 0.97599                         |
| Pt/C           | 0.054       | 0.99683                         |
| 0.09%Ru/Pt NWs | 0.1403      | 0.98153                         |
| 1.9%Ru/Pt NWs  | 0.1144      | 0.99005                         |

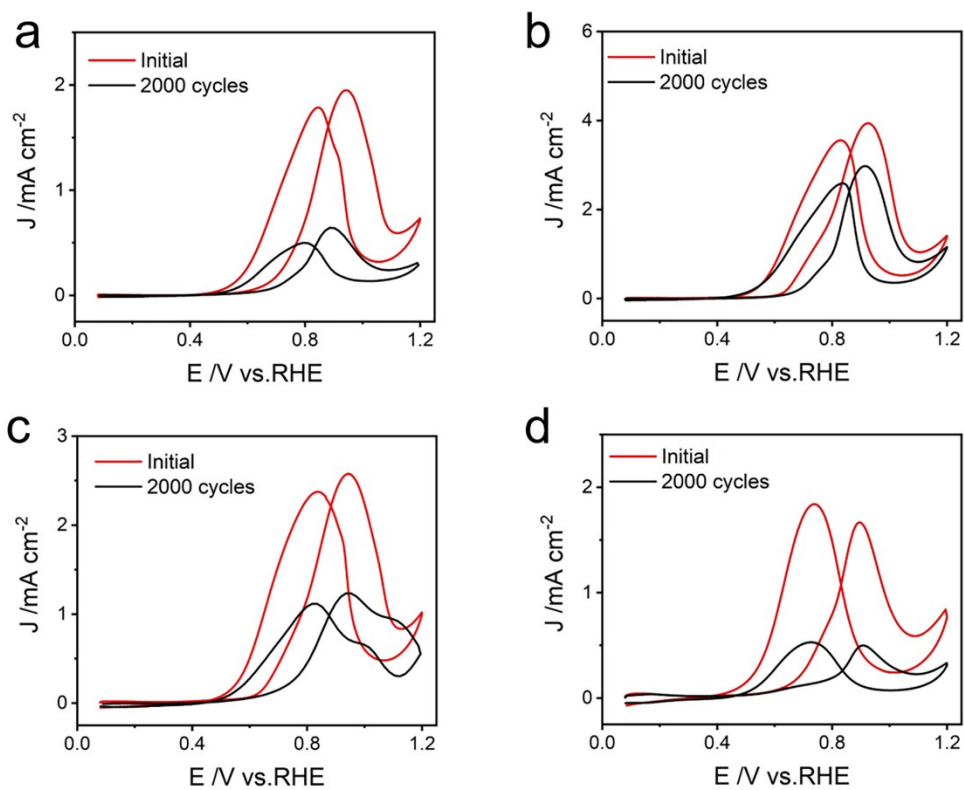

**Fig. S6.** The initial and after 2000 cycles of MOR for (a) Pt NWs, (b) Ru/Pt NWs, (c) Ru@Pt NWs and (d) Pt/C in 0.1M  $\text{HClO}_4$  and 1 M methanol solution at a scan rate of  $50 \text{ mV s}^{-1}$ .

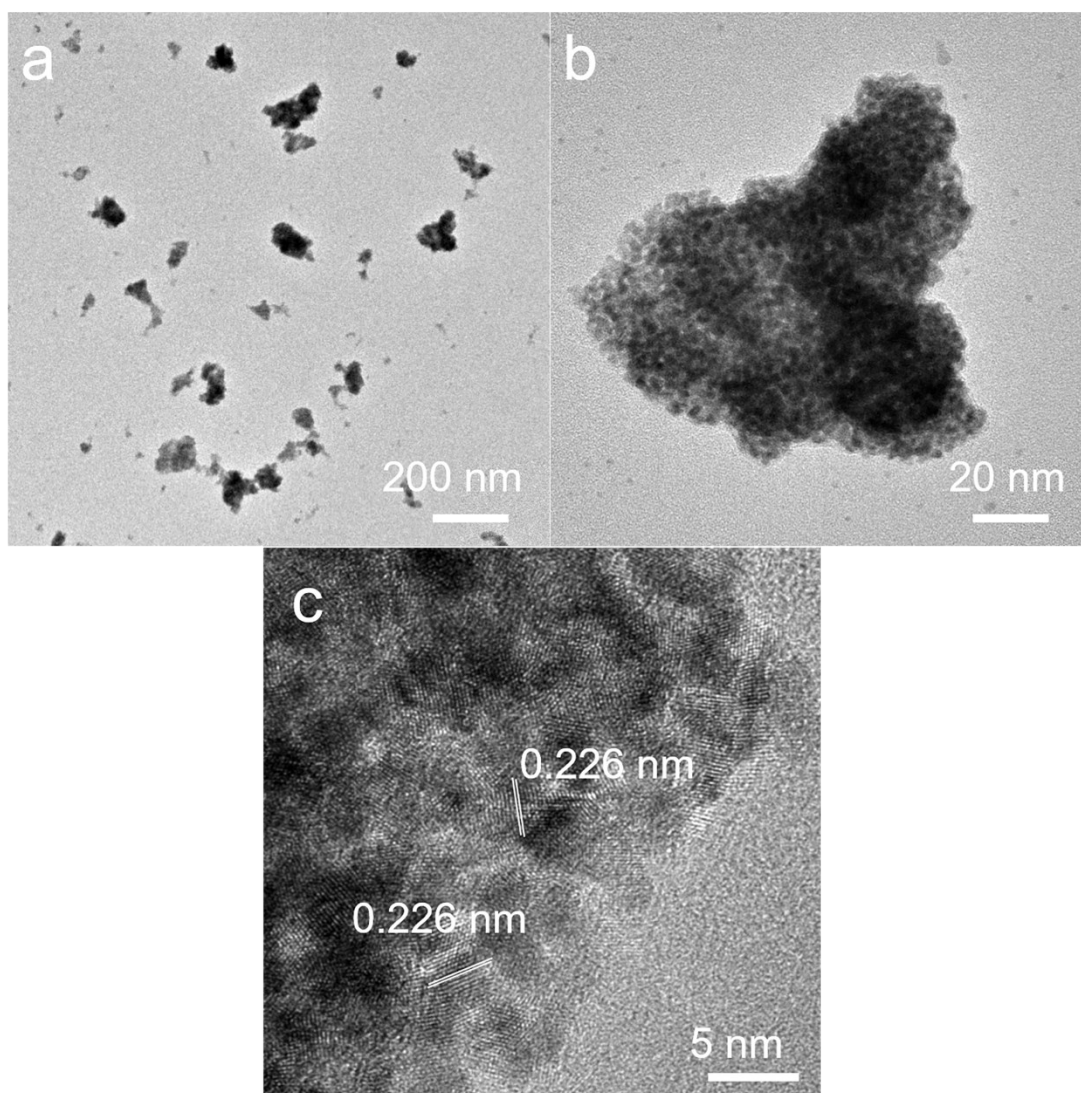

**Fig. S7.** TEM images of Pt<sub>3</sub>Ru<sub>1</sub> clusters.

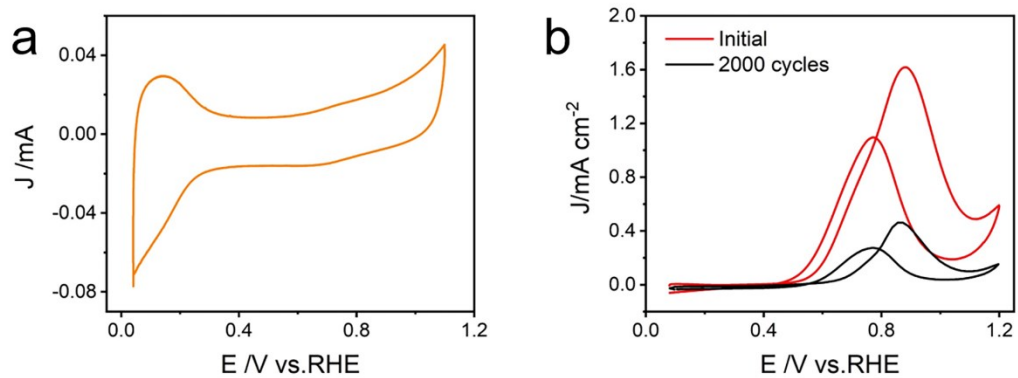

**Fig. S8.** A) CV curves, B) the initial and after 2000 cycles of MOR of Pt<sub>3</sub>Ru<sub>1</sub> catalyst in 0.1 M HClO<sub>4</sub> and 1 M methanol solution at a sweep rate of 50 mV s<sup>-1</sup>.

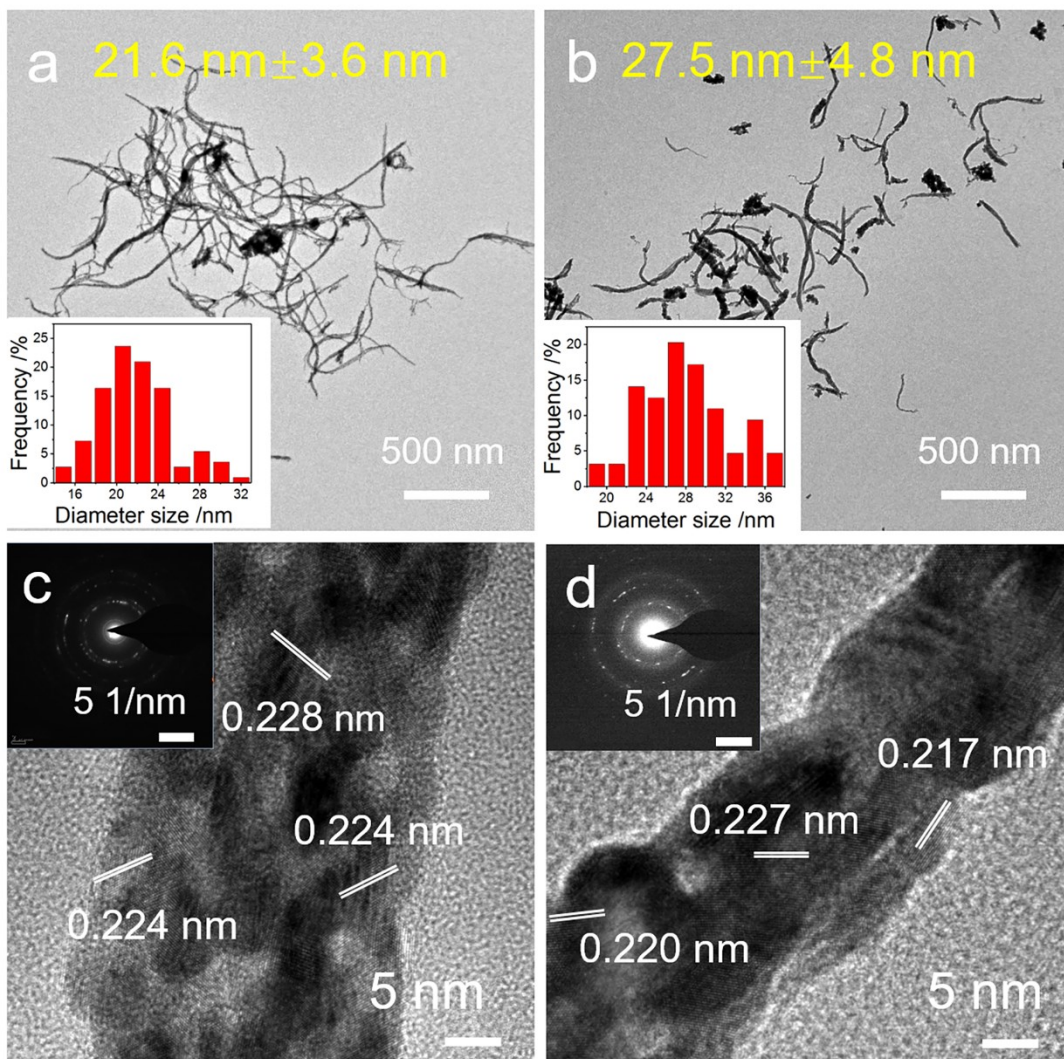

**Fig. S9.** (a) (b) TEM and (c) (d) HRTEM images of 0.09% Ru/Pt NWs and 1.9%Ru/Pt NWs.



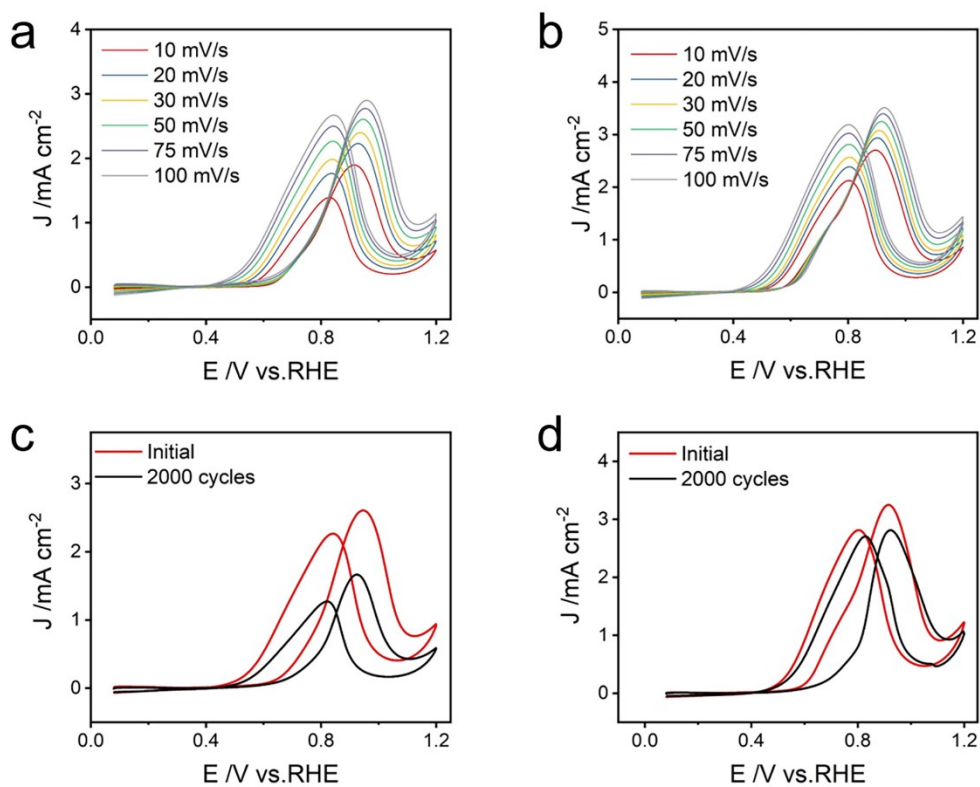

**Fig. S10.** (a-b) CV plots of methanol electrooxidation on (a) 0.09%Pt NWs and (b) 1.9%Ru/Pt NWs modified electrodes at different scan rates. (c-d) The initial and after 2000 cycles of MOR for (c) 0.09%Ru/Pt NWs and (d) 1.9%Ru/Pt NWs in 0.1M HClO<sub>4</sub> and 1 M methanol solution at a sweep rate of 50 mV s<sup>-1</sup>.

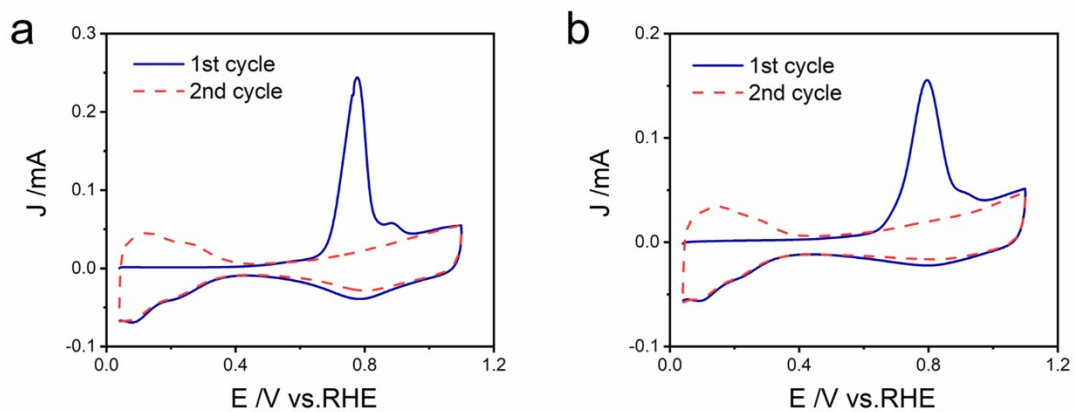

**Fig S11.** The whole CO stripping curves of (a) 0.09% Ru/Pt NWs and (b) 1.9% Ru/Pt NWs modified electrodes.
